# Supplementary material for: Climatology and Formation Environments of Severe Convective Windstorms and Tornadoes in the Perm Region (Russia) in 1984–2020
Source: MDPI journal article supplement (doi:10.3390/atmos12111407), 2021-10-26
Supplement: s1 [file s1]

## Supplementary Materials:

*Article*

# Climatology and Formation Environments of Severe Convective Windstorms and Tornadoes in the Perm Region (Russia) in 1984–2020

Andrey Shikhov <sup>1,2</sup>, Alexander Chernokulsky <sup>2,3\*</sup>, Nikolay Kalinin <sup>1</sup>, Alexey Bykov <sup>1</sup> and Evgeniya Pischalnikova <sup>1,4</sup>

<sup>1</sup> Faculty of Geography, Perm State University, 614068 Perm, Russia; and3131@inbox.ru (A.S.); kalinin@psu.ru (N.K.); blexx256@yandex.ru (A.B.); sinoptik.perm@yandex.ru (E.P.)

<sup>2</sup> A.M. Obukhov Institute of Atmospheric Physics, Russian Academy of Sciences, 119017 Moscow, Russia

<sup>3</sup> Institute of Geography, Russian Academy of Sciences, 119017 Moscow, Russia

<sup>4</sup> Perm Center for Hydrometeorology and Environmental Monitoring, 614030 Perm, Russia

\* Correspondence: a.chernokulsky@ifaran.ru; Tel.: +7-(926)-757-8573

**Table S1.** Median, minimum and maximum values, 25th and 75th percentiles of major indicators and convective indices for  $SGE_{WT}$  (numerator) and  $SGE_{NT}$  (denominator) Median values with statistically significant differences between two groups (based on K-S test) are highlighted.

| Variable        | Temperature Gradient at 850<br>hPa, °C/500 km | Dewpoint Temperature at<br>2m, °C | 3D Index, °C | SB CAPE, Jkg <sup>-1</sup> | CAPE255, Jkg <sup>-1</sup> | CIN, Jkg <sup>-1</sup> | DLS, m s <sup>-1</sup> | MLS, m s <sup>-1</sup> | LLS, m s <sup>-1</sup> | EH1   | PW, mm | 0-3 km SRH, m <sup>2</sup> s <sup>-2</sup> | 0-1 km SRH, m <sup>2</sup> s <sup>-2</sup> | SCP   | WMAXSHEAR |
|-----------------|-----------------------------------------------|-----------------------------------|--------------|----------------------------|----------------------------|------------------------|------------------------|------------------------|------------------------|-------|--------|--------------------------------------------|--------------------------------------------|-------|-----------|
| Median          | 9.5/                                          | 14.2/                             | 14.05/       | 986/                       | <u>1223/</u>               | <u>138/</u>            | <u>28.7/</u>           | <u>21.6/</u>           | <u>12.4/</u>           | 0.94/ | 30.7/  | <u>261/</u>                                | <u>194/</u>                                | 1.93/ | 1025/     |
|                 | 8.5                                           | 15.0                              | 12.70        | 1120                       | <u>1743</u>                | <u>495</u>             | <u>20.4</u>            | <u>15.8</u>            | <u>9.9</u>             | 1.0   | 33.7   | <u>181</u>                                 | <u>120</u>                                 | 1.41  | 758       |
| 25th percentile | 5.2/                                          | 12.0/                             | 12.7/        | 346/                       | 438/                       | 77/                    | 25.1/                  | 17.9/                  | 10.2/                  | 0.40/ | 25.8/  | 192/                                       | 148/                                       | 0.96/ | 653/      |
|                 | 5.5                                           | 12.6                              | 7.9          | 565                        | 1087                       | 201                    | 15.7                   | 11.2                   | 7.5                    | 0.42  | 28.6   | 127                                        | 77                                         | 0.63  | 525       |
| 75th percentile | 12.0/                                         | 17.1/                             | 16.1/        | 1251/                      | 1463/                      | 247/                   | 33.5/                  | 25.3/                  | 14.2/                  | 1.97/ | 36.5/  | 355/                                       | 244/                                       | 3.62/ | 1285/     |
|                 | 11.0                                          | 17.0                              | 15.9         | 1694                       | 2427                       | 817                    | 23.9                   | 19.2                   | 11.6                   | 1.70  | 38.1   | 255                                        | 176                                        | 2.70  | 1067      |
| Minimum         | 3.5/                                          | 9.9/                              | 6.8/         | 112/                       | 179/                       | 28/                    | 19.1/                  | 7.8/                   | 4.7/                   | 0.08/ | 20.7/  | 56.7/                                      | 44.1/                                      | 0.09/ | 356/      |
|                 | 2.0                                           | -4.1                              | -6.9         | 0                          | 66                         | 16                     | 7.1                    | 4.7                    | 2.5                    | 0.0   | 8.9    | 34.9                                       | 19.0                                       | 0.01  | 11        |
| Maximum         | 14.5/                                         | 20.5/                             | 19.3/        | 2798/                      | 3240/                      | 982/                   | 45.6/                  | 30.4/                  | 16.8/                  | 9.4/  | 45.3/  | 666/                                       | 461/                                       | 11.8/ | 1731/     |
|                 | 17.0                                          | 21.0                              | 20.6         | 2885                       | 4201                       | 995                    | 52.4                   | 26.0                   | 19.9                   | 4.3   | 45.1   | 726                                        | 444                                        | 5.5   | 1594      |

**Table S2.** The same for  $SGE_{WD}$  and  $SGE_{ND}$  respectively. Median values with statistically significant differences between two groups (based on K-S test) are highlighted.

| Variable           | Temperature Gradient at 850<br>hPa, °C/500 km | Dewpoint Temperature at 2m, °C | 3D Index, °C  | SB CAPE, Jkg <sup>-1</sup> | CAPE255, Jkg <sup>-1</sup> | CIN, Jkg <sup>-1</sup> | DLS, m s <sup>-1</sup>      | MLS, m s <sup>-1</sup>      | LLS, m s <sup>-1</sup>     | EH1           | PW, mm        | 0-3 km SRH, m <sup>2</sup> s <sup>-2</sup> | 0-1 km SRH, m <sup>2</sup> s <sup>-2</sup> | SCP                         | WMAXSHEAR                  |
|--------------------|-----------------------------------------------|--------------------------------|---------------|----------------------------|----------------------------|------------------------|-----------------------------|-----------------------------|----------------------------|---------------|---------------|--------------------------------------------|--------------------------------------------|-----------------------------|----------------------------|
| Median             | <u>11.0/</u><br><u>7.5</u>                    | 15.5/<br>14.9                  | 13.6/<br>12.9 | 1131/<br>997               | 1552/<br>1477              | 337/<br>327            | <u>25.4/</u><br><u>20.9</u> | <u>20.3/</u><br><u>14.9</u> | <u>11.7/</u><br><u>9.9</u> | 1.26/<br>0.87 | 34.5/<br>32.1 | <u>260/</u><br><u>176</u>                  | <u>192/</u><br><u>119</u>                  | <u>2.48/</u><br><u>1.28</u> | <u>1156/</u><br><u>710</u> |
| 25th<br>percentile | 8.0/<br>5.0                                   | 13.0/<br>12.0                  | 10.8/<br>7.5  | 435/<br>543                | 1124/<br>928               | 97/<br>150             | 20.9/<br>14.5               | 17.9/<br>10.9               | 10.0/<br>7.5               | 0.40/<br>0.42 | 26.9/<br>27.6 | 191/<br>121                                | 126/<br>73                                 | 1.52/<br>0.48               | 664/<br>514                |
| 75th percentile    | 12.0/<br>10.0                                 | 18.0/<br>17.0                  | 16.8/<br>15.8 | 1855/<br>1608              | 2373/<br>2164              | 795/<br>755            | 29.9/<br>24.8               | 23.5/<br>18.4               | 13.5/<br>11.4              | 3.03/<br>1.43 | 39.2/<br>36.7 | 333/<br>238                                | 227/<br>162                                | 4.36/<br>2.43               | 1289/<br>1019              |
| Minimum            | 4.0/<br>2.0                                   | 9.9/<br>-4.1                   | 6.0<br>/-6.9  | 35/<br>0                   | 179/<br>66                 | 22/<br>16              | 16.3/<br>7.1                | 6.8/<br>4.7                 | 3.2/<br>3.5                | 0.04/<br>0.0  | 20.7/<br>8.9  | 55.1/<br>34.9                              | 22.8/<br>19.0                              | 0.04/<br>0.01               | 191/<br>10.5               |
| Maximum            | 16.0/<br>17.0                                 | 20.9/<br>20.1                  | 19.3/<br>20.6 | 2885/<br>2769              | 3869/<br>4201              | 982/<br>995            | 45.6/<br>52.4               | 30.4/<br>26.0               | 16.8/<br>19.9              | 9.37/<br>2.43 | 45.3/<br>43.8 | 666/<br>726                                | 461/<br>444                                | 11.7/<br>5.0                | 1731/<br>1594              |
